# Supplementary material for: How serious a problem is subsoil compaction in the Netherlands? A survey based on probability sampling
Source: Copernicus journal article supplement (doi:10.5194/soil-4-37-2018), 2018-02-05
Supplement: Supplementary file 1 [file soil-4-37-2018-supplement.zip]

Archive with 3 entries (3 files):
- soil-4-37-2018-supplement-title-page.pdf
- compactionstrata_NL.csv
- compactiondata_NL.csv
