# Supplementary material for: How serious a problem is subsoil compaction in the Netherlands? A survey based on probability sampling
Source: Copernicus journal article supplement (doi:10.5194/soil-4-37-2018), 2018-02-05
Supplement: Supplementary file 1 [file soil-4-37-2018-supplement.zip › compactiondata_NL.csv]

	id	bd_rel	porosity_rel	compacted	stratum	collapsedstrata
1	1102	0.56	1.78	FALSE	1100	11
2	1201	0.84	1.49	FALSE	1200	12
3	1202	0.91	1.38	FALSE	1200	12
4	1301	1	1.02	TRUE	1300	13
5	1303	0.93	1.04	FALSE	1300	13
6	1304	1	0.97	TRUE	1300	13
7	1305	0.56	1.66	FALSE	1300	13
8	1307	1.03	1.05	TRUE	1300	13
9	1308	1	0.99	TRUE	1300	13
10	1310	0.84	1.16	FALSE	1300	13
11	1313	0.9	1.21	FALSE	1300	13
12	1314	1.05	0.91	TRUE	1300	13
13	1315	0.87	1.1	FALSE	1300	13
14	1316	0.87	1.17	FALSE	1300	13
15	1317	0.95	1.05	FALSE	1300	13
16	1336	1.13	0.87	TRUE	1300	13
17	1401	0.89	1.35	FALSE	1400	14
18	1402	0.98	1.22	FALSE	1400	14
19	1403	0.73	1.37	FALSE	1400	14
20	1404	0.99	1	FALSE	1400	14
21	1405	0.88	1.29	FALSE	1400	14
22	1407	0.94	1.08	FALSE	1400	14
23	1408	0.88	1.16	FALSE	1400	14
24	1409	0.93	1.11	FALSE	1400	14
25	1410	0.88	1.31	FALSE	1400	14
26	1411	0.8	1.31	FALSE	1400	14
27	1412	0.85	1.15	FALSE	1400	14
28	1413	1.05	0.91	TRUE	1400	14
29	1414	1.03	0.95	TRUE	1400	14
30	1416	0.9	1.12	FALSE	1400	14
31	1429	0.98	0.96	TRUE	1400	14
32	1452	1.07	0.67	TRUE	1400	14
33	1501	0.95	1.04	FALSE	1500	15
34	1502	0.95	1.11	FALSE	1500	15
35	1503	1.05	1.11	TRUE	1500	15
36	1504	0.98	1.26	FALSE	1500	15
37	1505	1.03	0.94	TRUE	1500	15
38	1506	0.92	0.99	TRUE	1500	15
39	1507	0.84	1.22	FALSE	1500	15
40	2101	0.69	1.68	FALSE	2100	11
41	2201	0.79	1.41	FALSE	2200	12
42	2302	1.04	0.91	TRUE	2300	23
43	2303	0.84	1.28	FALSE	2300	23
44	2304	1.03	0.96	TRUE	2300	23
45	2306	1.04	0.99	TRUE	2300	23
46	2307	1.03	0.92	TRUE	2300	23
47	2308	0.96	1.04	FALSE	2300	23
48	2309	0.89	1.12	FALSE	2300	23
49	2311	0.79	1.43	FALSE	2300	23
50	2314	1.05	1.05	TRUE	2300	23
51	2317	0.98	0.98	TRUE	2300	23
52	2401	1.06	0.91	TRUE	2400	24
53	2402	1.03	0.91	TRUE	2400	24
54	2403	0.63	1.51	FALSE	2400	24
55	2404	1.04	0.88	TRUE	2400	24
56	2405	0.99	1	FALSE	2400	24
57	2502	1	0.94	TRUE	2500	25
58	2503	1.08	0.87	TRUE	2500	25
59	2509	1.06	0.88	TRUE	2500	25
60	3101	0.98	1.11	FALSE	3100	11
61	3201	0.92	1.21	FALSE	3200	12
62	3301	1	0.94	TRUE	3300	33
63	3302	0.96	1	TRUE	3300	33
64	3303	1.03	0.9	TRUE	3300	33
65	3304	0.98	1.01	FALSE	3300	33
66	3305	0.96	1.18	FALSE	3300	33
67	3307	1.11	0.87	TRUE	3300	33
68	3309	0.98	0.98	TRUE	3300	33
69	3310	0.94	1	TRUE	3300	33
70	3311	1.05	0.87	TRUE	3300	33
71	3312	1	0.94	TRUE	3300	33
72	3313	0.93	0.97	TRUE	3300	33
73	3314	0.88	1.15	FALSE	3300	33
74	3315	0.9	1.21	FALSE	3300	33
75	3316	1.02	0.94	TRUE	3300	33
76	3318	1.1	0.92	TRUE	3300	33
77	3322	1	0.95	TRUE	3300	33
78	3323	1.03	0.99	TRUE	3300	33
79	3329	1.03	0.9	TRUE	3300	33
80	3343	1.01	0.95	TRUE	3300	33
81	3401	0.93	1.06	FALSE	3400	34
82	3402	1.07	0.87	TRUE	3400	34
83	3404	1.09	0.85	TRUE	3400	34
84	3405	0.92	1.13	FALSE	3400	34
85	3406	0.93	1.06	FALSE	3400	34
86	3407	0.97	1	TRUE	3400	34
87	3408	1.06	0.89	TRUE	3400	34
88	3409	0.86	1.17	FALSE	3400	34
89	3410	1.14	0.78	TRUE	3400	34
90	3411	1.03	0.92	TRUE	3400	34
91	3412	1	0.94	TRUE	3400	34
92	3415	0.96	1.05	FALSE	3400	34
93	3503	0.98	1	FALSE	3500	35
94	3504	1	0.95	TRUE	3500	35
95	3505	0.35	1.96	FALSE	3500	35
96	3509	1.1	0.8	TRUE	3500	35
97	3513	1.07	0.88	TRUE	3500	35
98	3517	0.74	1.33	FALSE	3500	35
99	4101	0.96	1.14	FALSE	4100	11
100	4201	0.94	1.12	FALSE	4200	12
101	4302	1.03	0.95	TRUE	4300	43
102	4303	0.9	1.15	FALSE	4300	43
103	4304	0.97	1.07	FALSE	4300	43
104	4307	1.03	0.93	TRUE	4300	43
105	4308	1.03	0.94	TRUE	4300	43
106	4309	1.02	0.96	TRUE	4300	43
107	4310	0.82	1.25	FALSE	4300	43
108	4311	0.96	1.07	FALSE	4300	43
109	4313	0.94	1.09	FALSE	4300	43
110	4314	0.98	1.01	FALSE	4300	43
111	4316	1.11	0.91	TRUE	4300	43
112	4317	1.12	0.85	TRUE	4300	43
113	4344	0.99	1	TRUE	4300	43
114	4348	1.01	1	TRUE	4300	43
115	4401	1.03	0.98	TRUE	4400	44
116	4402	0.88	1.14	FALSE	4400	44
117	4403	0.95	1.05	FALSE	4400	44
118	4404	1.08	0.87	TRUE	4400	44
119	4405	1.07	0.87	TRUE	4400	44
120	4407	0.94	1.07	FALSE	4400	44
121	4408	0.96	1.04	FALSE	4400	44
122	4409	0.74	1.38	FALSE	4400	44
123	4410	0.93	1.09	FALSE	4400	44
124	4411	0.94	1.07	FALSE	4400	44
125	4420	0.97	1.03	FALSE	4400	44
126	4501	0.99	0.99	TRUE	4500	45
127	4503	0.71	1.43	FALSE	4500	45
128	4511	0.96	1.11	FALSE	4500	45
