# Supplementary material for: How serious a problem is subsoil compaction in the Netherlands? A survey based on probability sampling
Source: Copernicus journal article supplement (doi:10.5194/soil-4-37-2018), 2018-02-05
Supplement: Supplementary file 1 [file soil-4-37-2018-supplement.zip › compactionstrata_NL.csv]

	stratum	Gebied	oppervlakte	Risico	collapsedstrata
1	1100	Overige prov.	1608	1	11
2	1200	Overige prov.	80850	2	12
3	1300	Overige prov.	499733	3	13
4	1400	Overige prov.	600360	4	14
5	1500	Overige prov.	253492	5	15
6	2100	Gelderland	372	1	11
7	2200	Gelderland	17890	2	12
8	2300	Gelderland	211964	3	23
9	2400	Gelderland	113324	4	24
10	2500	Gelderland	52142	5	25
11	3100	Noord-Brabant	87	1	11
12	3200	Noord-Brabant	5176	2	12
13	3300	Noord-Brabant	194491	3	33
14	3400	Noord-Brabant	118347	4	34
15	3500	Noord-Brabant	51525	5	35
16	4100	Zeeland	419	1	11
17	4200	Zeeland	620	2	12
18	4300	Zeeland	71619	3	43
19	4400	Zeeland	58709	4	44
20	4500	Zeeland	16391	5	45
