# Supplementary material for: How serious a problem is subsoil compaction in the Netherlands? A survey based on probability sampling
Source: Copernicus journal article supplement (doi:10.5194/soil-4-37-2018), 2018-02-05
Supplement: Supplementary file 1 [file soil-4-37-2018-supplement.zip › soil-4-37-2018-supplement-title-page.pdf]

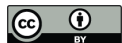

## *Supplement of*

# **How serious a problem is subsoil compaction in the Netherlands? A survey based on probability sampling**

**Dick J. Brus and Jan J. H. van den Akker**

*Correspondence to:* Dick J. Brus ([dick.brus@wur.nl](mailto:dick.brus@wur.nl))

- [soil-4-37-2018-supplement-title-page.pdf](#)
- [compactiondata\\_NL.csv](#)
- [compactionstrata\\_NL.csv](#)

The copyright of individual parts of the supplement might differ from the CC BY 4.0 License.
